# Supplementary material for: Mesoporous silica MCM-41 as a highly active, recoverable and reusable catalyst for direct amidation of fatty acids and long-chain amines
Source: Royal Society of Chemistry journal article supplement (doi:10.1039/c0gc00673d), 2011-01-01

## Mesoporous silica MCM-41 as highly active, recoverable and reusable catalyst for direct amidation of fatty acids and long-chain amines

Kenichi Komura\*, Yu Nakano, Mamoru Koketsu

*Department of Materials Science and Technology, Faculty of Engineering, Gifu University, Gifu City, 501-1193, Japan.*

### Experimental

**Materials:** Mesoporous silicas, MCM-41 and aluminosilicate [Al]-MCM-41 were synthesized in our laboratory by reported procedure in literatures.<sup>1</sup> FSM-16 was gifted from Toyota Central R&D LABS., INC. H-Y zeolite (SiO<sub>2</sub>/Al<sub>2</sub>O<sub>3</sub> = 5.6, HSZ-320 HOA) was purchased from Tosoh Corporation, Japan. Ion-exchanged resin, Nafion<sup>®</sup> (NR50, 0.8 mmol H<sup>+</sup>/g) was purchased from Aldrich Japan. Mesoporous silica was calcined at 550 °C for 6 h prior to use, and all of organic reagents were commercial available and used without purification.

**Measurements:** Powder X-ray diffractograms were recorded on a XRD-6000 diffractometer with Cu K $\alpha$  radiation ( $\lambda = 0.15418$  nm) (Shimadzu Corporation, Japan). Nitrogen adsorption isotherms were obtained at 77 K using a Belsorp 28SA apparatus (Bel Japan Inc., Japan). TG/DTA measurements were performed on a Shimadzu DTG-50 apparatus with temperature programmed rate of 10 °C/min in air stream. <sup>1</sup>H and <sup>13</sup>C NMR spectra were measured by an ECA-500 FT-NMR (JEOL Ltd., Japan)

**Preparation of MCM-41:** A 25.1 g of hexadecyltrimethylammonium bromide (HDTMABr) was completely resolved in 77.0 g of distilled water at 50 °C (solution A). In a 300 mL beaker, a 28.1 g of sodium silicate (SiO<sub>2</sub>: 29.3%, Na<sub>2</sub>O: 9.3% in water) was added into an aqueous H<sub>2</sub>SO<sub>4</sub> solution (0.31 mmol g<sup>-1</sup>), then was added into the solution A. After stirring for 1 h at ambient temperature, the pH of the solution was adjusted to 9.98 by adding H<sub>2</sub>SO<sub>4</sub> solution. The resulting white suspension was transferred into a 500 mL of bottle (polypropylene), and stood at 100 °C for 9 days. The obtained white powder was washed with distilled water and EtOH thoroughly and dried at 50 °C for overnight. The calcination of as-synthesized MCM-41 was taken place at 550 °C for 6 h.

---

1. H. -P. Lin, S. Cheng, C. -Y. Mou, *Micropor. Mater.*, 1997, **10**, 111-121.

### Powder-XRD chart of MCM-41

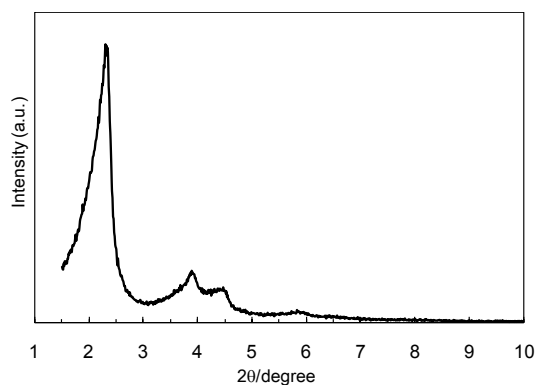

### Nitrogen isotherm of MCM-41

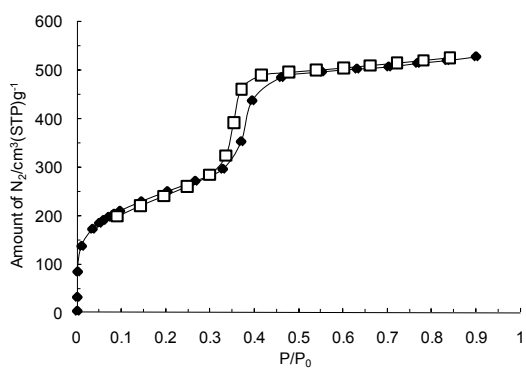

### BJH plot of MCM-41

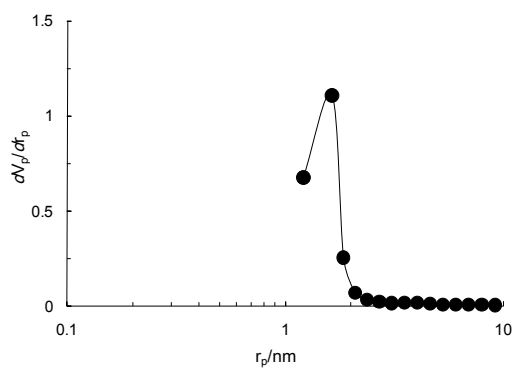

Supplement: c0gc00673d.pdf [file c0gc00673d.pdf]
